# Supplementary material
Source: ML conference proceedings conference paper supplement (https://proceedings.neurips.cc/paper_files/paper/2019/hash/0d441de75945e5acbc865406fc9a2559-Abstract.html)
Supplement: Supplementary file [file 0d441de75945e5acbc865406fc9a2559-Supplemental.zip]

## A Concentration Inequalities

### Hoeffding's inequality [23]:

Let  $X_1, \dots, X_n$  be independent with  $u_i = \mathbf{E}[X_i]$ ,  $X_i \in [0, 1]$ , for all  $1 \leq i \leq n$ . Then,

$$\Pr\left(\frac{\sum(X_i - u_i)}{n} \geq t\right) \leq \exp[-2n \cdot t^2], \quad (3)$$

and

$$\Pr\left(\frac{\sum(X_i - u_i)}{n} \leq -t\right) \leq \exp[-2n \cdot t^2], \quad (4)$$

**Markov's inequality:** If  $X$  is a non-negative random variable and  $a > 0$ , then the probability that  $X$  is at least  $a$  is at most the expectation of  $X$  divided by  $a$ :

$$\Pr(X \geq a) \leq \frac{\mathbf{E}[X]}{a}. \quad (5)$$

## B Proofs of Lemmas in Section 2

### Proof of lemma 1:

*Proof.* First, we prove that at any iteration  $r$ ,  $\Pr[\hat{\theta}_{i^*} \geq \theta_{i^*} - \epsilon/8] \geq 1 - \frac{\delta}{2k}$ . In the first iteration (i.e.,  $r = 1$ ),  $S_r$  is exactly the same as the input arm set  $S$  (i.e.,  $S_1 = S$ ), and Algorithm 1 samples at least  $\frac{32}{\epsilon^2} \log \frac{k}{\delta_1}$  times for every arm in  $S_1$ . Therefore, every arm  $i^*$  is initialized for  $\hat{\theta}_{i^*}$ . Based on Hoeffding bound, we have  $\hat{\theta}_{i^*} \geq \theta_{i^*} - \epsilon/8$  with probability at least  $1 - \frac{\delta_1}{k}$ , for the case of  $r = 1$ .

Assume that in iteration  $r - 1$ ,  $\hat{\theta}_{i^*} \geq \theta_{i^*} - \epsilon/8$  holds. Then, at iteration  $r$ , if  $\hat{\theta}_{i^*}$  is not updated,  $\hat{\theta}_{i^*} \geq \theta_{i^*} - \epsilon/8$  still holds. Otherwise, by Hoeffding's inequality, in iteration  $r$ ,

$$\Pr[\hat{\theta}_{i^*} \geq \theta_{i^*} - \epsilon/8] \geq 1 - \exp[-(32/\epsilon^2) \log(k/\delta_r) \cdot 2(\epsilon/8)^2] \geq 1 - \delta_r/k. \quad (6)$$

By the union bound, for all iterations,

$$\Pr[\hat{\theta}_{i^*} \geq \theta_{i^*} - \epsilon/8] \geq 1 - \sum_{r=1} \delta_r/k \geq 1 - \sum_{r=1} \frac{\delta}{2k \cdot 2^r} \geq 1 - \frac{\delta}{2k}. \quad (7)$$

Applying the union bound again, we have that with probability  $1 - \delta/2$ , for all  $i \in [1, k]$ ,

$$\hat{\theta}_{i^*} \geq \theta_{i^*} - \epsilon/8. \quad (8)$$

Let  $j_r$  be an arm inserted into  $S'$  in iteration  $r$ . Since we have re-sample  $Q_r$  times for  $j_r$ , the estimation in Line 8 of Algorithm 1 is unbiased. By Hoeffding's inequality,

$$\Pr[\hat{\theta}_{j_r} \leq \theta_{j_r} + \epsilon/8] \geq 1 - \delta_r/k. \quad (9)$$

Since we insert at most  $k$  values to  $S'$ , by the union bound, we have that for every arm  $j_r$  inserted into  $S'$ ,

$$\Pr[\hat{\theta}_{j_r} \leq \theta_{j_r} + \epsilon/8] \geq 1 - \delta_r. \quad (10)$$

Applying the union bound again, we have that for each iteration  $r$ ,

$$\Pr[\hat{\theta}_{j_r} \leq \theta_{j_r} + \epsilon/8] \geq 1 - \sum_{r=1} \delta_r \geq 1 - \delta/2. \quad (11)$$

Let  $i^o$  be the arm with the  $i^{th}$  largest value in  $S'$ . Assume that both Eq. (8) and Eq. (11) hold. By Eq. (8), there are at least  $i$  arms whose empirical values are greater than  $\theta_i - \epsilon/8$ . From Line 10 of Algorithm 1, we have

$$\theta_{i^o} + \epsilon/8 \geq \hat{\theta}_{i^o} \geq \min\{\hat{\theta}_1, \dots, \hat{\theta}_{i^*}\} - 3/4\epsilon \geq \hat{\theta}_{i^*} - 3/4\epsilon \geq \theta_{i^*} - 3/4\epsilon - 1/8\epsilon. \quad (12)$$

From above equation, we have that with probability  $1 - \delta$ , for all  $i \in [1, k]$ ,  $\theta_{i^o} \geq \theta_{i^*} - \epsilon$ .

Similarly, we can prove the second part of Lemma 1, by replacing  $\epsilon/8 \leftarrow (\epsilon - \epsilon_1)/2$ ,  $32/(\epsilon^2) \leftarrow 2/(\epsilon - \epsilon_1)^2$  and  $3/4\epsilon \leftarrow \epsilon_1$ .  $\square$

## Proof of Lemma 2

*Proof.* For  $S_r$ , let  $\theta_1, \dots, \theta_{|S_r|}$  be the decreasing order of arm's average reward. In Line 6 of Algorithm 1, if  $k' = |S_r|$ , then  $S_{r+1} = \emptyset$  and the lemma easily follows. Hence, we focus on proving the hard case, i.e., when  $k' = k$  in Line 6 of Algorithm 1. Let  $\lceil (\frac{\delta_r}{k})^{\beta_r} \cdot |S_r| \rceil + k - 1 = m$  and  $\theta_m = u$ . We divide  $[0, \theta_1]$  into three parts:  $[0, u - 3\epsilon/8)$ ,  $[u - 3\epsilon/8, u)$  and  $[u, \theta_1]$ . And denote  $A_1, A_2, A_3$  be the sets of arms in  $S_r$  whose average means are in  $[0, u - 3\epsilon/8)$ ,  $[u - 3\epsilon/8, u)$  and  $[u, \theta_1]$ , respectively. Let  $X_{A_i}$  be the number of arms in  $A_i$  whose empirical values updated at iteration  $r$  are greater than  $u - 3\epsilon/16$ , where  $i = 1, 2, 3$ . Furthermore, let  $b_r$  be the arm with the smallest mean that is inserted into  $S'$  in iteration  $r$ . We prove that with high probability, both following conditions hold.

1:  $b_r \notin A_1$ ;

2:  $S'(k) + 3\epsilon/4 \geq u + 3\epsilon/16$ .

We first prove Condition 1. By Hoeffding's inequality, for  $i \in A_1$ ,

$$\Pr[\hat{\theta}_i \leq \theta_i + 3\epsilon/16] \geq 1 - \exp\left(-2\epsilon^2 / \left(\frac{16}{3}\right)^2 \cdot (57/\epsilon^2) \cdot \beta_r \log\left(\frac{k}{\delta_r}\right)\right) \geq 1 - \left(\frac{\delta_r}{k}\right)^{4\beta_r}. \quad (13)$$

From Eq. (13), for  $i \in A_1$ , with probability  $1 - (\frac{\delta_r}{k})^{4\beta_r}$ ,  $\hat{\theta}_i \leq \theta_i + 3\epsilon/16 \leq u - 3\epsilon/16$ . This implies  $\mathbf{E}[X_{A_1}] \leq (\frac{\delta_r}{k})^{4\beta_r} \cdot |S_r|$ . From Markov's inequality:

$$\Pr[X_{A_1} \geq (\frac{\delta_r}{k})^{2\beta_r} / 4 |S_r|] \leq \frac{\mathbf{E}[X_{A_1}]}{(\frac{\delta_r}{k})^{2\beta_r} / 4 |S_r|} \leq \frac{(\frac{\delta_r}{k})^{4\beta_r} \cdot |S_r|}{(\frac{\delta_r}{k})^{2\beta_r} / 4 |S_r|} \leq 4 \left(\frac{\delta_r}{k}\right)^{2\beta_r}. \quad (14)$$

Let  $\xi_1$  be the event  $X_{A_1} \leq (\frac{\delta_r}{k})^{2\beta_r} / 4 |S_r|$ , then  $\Pr[\xi_1] \geq 1 - 4 \left(\frac{\delta_r}{k}\right)^{2\beta_r}$ .

On the other hand, by Hoeffding's inequality, for  $i \in A_3$ ,

$$\Pr[\hat{\theta}_i \geq \theta_i - 3\epsilon/16] \geq 1 - \exp\left(-\epsilon^2 \cdot \frac{9}{256} \cdot (57/\epsilon^2) \cdot \beta_r \log(1/\frac{\delta_r}{k})\right) \geq 1 - \left(\frac{\delta_r}{k}\right)^{4\beta_r}. \quad (15)$$

By the above equation, for  $i \in A_3$ ,  $\Pr[\hat{\theta}_i \leq u - 3\epsilon/16] \leq (\frac{\delta_r}{k})^{4\beta_r}$ . We divide  $A_3$  into two parts  $B_1$  and  $B_2$ , where  $|B_1| = k - 1$  and  $|B_2| = \lceil (\frac{\delta_r}{k})^{\beta_r} |S_r| \rceil$ . Then

$$\Pr[X_{B_1} = k - 1] \geq 1 - \left(\frac{\delta_r}{k}\right)^{4\beta_r} \cdot (k - 1) \geq 1 - \left(\frac{\delta_r}{k}\right)^{3\beta_r}, \quad (16)$$

and

$$\begin{aligned} \Pr[X_{B_2} < \lceil (\frac{\delta_r}{k})^{\beta_r} |S_r| / 2 \rceil] &\leq \left( \frac{\lceil (\frac{\delta_r}{k})^{\beta_r} |S_r| \rceil}{\lceil (\frac{\delta_r}{k})^{\beta_r} |S_r| \rceil - \lceil (\frac{\delta_r}{k})^{\beta_r} |S_r| / 2 \rceil + 1} \right) \cdot \left(\frac{\delta_r}{k}\right)^{4\beta_r} \cdot \left[ \lceil (\frac{\delta_r}{k})^{\beta_r} |S_r| \rceil - \lceil (\frac{\delta_r}{k})^{\beta_r} |S_r| / 2 \rceil + 1 \right] \\ &\leq 2^{\lceil (\frac{\delta_r}{k})^{\beta_r} |S_r| \rceil} \cdot \left(\frac{\delta_r}{k}\right)^{4\beta_r} \cdot \left(\frac{\delta_r}{k}\right)^{\beta_r |S_r| / 2} \\ &\leq 2^{\lceil (\frac{\delta_r}{k})^{\beta_r} |S_r| \rceil} \cdot \left(\frac{\delta_r}{k}\right)^{2\beta_r} \cdot \left(\frac{\delta_r}{k}\right)^{\beta_r |S_r| / 2} \cdot \left(\frac{\delta_r}{k}\right)^{2\beta_r} \cdot \left(\frac{\delta_r}{k}\right)^{\beta_r |S_r| / 2} \\ &\leq 2^{\lceil (\frac{\delta_r}{k})^{\beta_r} |S_r| \rceil} \cdot (1/16)^{\lceil (\frac{\delta_r}{k})^{\beta_r} |S_r| \rceil} \cdot \left(\frac{\delta_r}{k}\right)^{2\beta_r} \cdot \left(\frac{\delta_r}{k}\right)^{\beta_r |S_r| / 2} \\ &\leq \left(\frac{\delta_r}{k}\right)^{2\beta_r}. \end{aligned} \quad (17)$$

Let  $\xi_2$  be the event that  $X_{A_3} \geq \lceil (\frac{\delta_r}{k})^{\beta_r} |S_r| / 2 \rceil + k - 1$ , then  $\Pr[\xi_2] \geq 1 - (\frac{\delta_r}{k})^{2\beta_r} - (\frac{\delta_r}{k})^{3\beta_r}$ .

If both  $\xi_1$  and  $\xi_2$  hold, then there are more than  $\lceil (\frac{\delta_r}{k})^{\beta_r} |S_r| / 2 \rceil + k - 1$  arms with empirical value greater than  $u - 3\epsilon/16$ . By the union bound,  $\Pr[\xi_1 \cap \xi_2] \geq 1 - 4 \left(\frac{\delta_r}{k}\right)^{2\beta_r} - \left(\frac{\delta_r}{k}\right)^{2\beta_r} - \left(\frac{\delta_r}{k}\right)^{3\beta_r} = 1 - 5 \left(\frac{\delta_r}{k}\right)^{2\beta_r} - \left(\frac{\delta_r}{k}\right)^{3\beta_r}$ .

Assume that both  $\xi_1$  and  $\xi_2$  hold, then in iteration  $r$

$$\begin{aligned}
\Pr(b_r \in A_1) &\leq \frac{(\frac{\delta_r}{k})^{2\beta_r}/4|S_r|}{[(\frac{\delta_r}{k})^{\beta_r}|S_r|/2] + k - 1} + (1 - \frac{(\frac{\delta_r}{k})^{2\beta_r}/4|S_r|}{[(\frac{\delta_r}{k})^{\beta_r}|S_r|/2] + k - 1}) \frac{(\frac{\delta_r}{k})^{2\beta_r}/4|S_r|}{[(\frac{\delta_r}{k})^{\beta_r}|S_r|/2] + k - 2} + \dots \\
&\leq \frac{(\frac{\delta_r}{k})^{2\beta_r}/4|S_r|}{[(\frac{\delta_r}{k})^{\beta_r}|S_r|/2] + k - 1} + \frac{(\frac{\delta_r}{k})^{2\beta_r}/4|S_r|}{[(\frac{\delta_r}{k})^{\beta_r}|S_r|/2] + k - 2} + \dots \\
&\leq \sum_{i=1}^k \frac{(\frac{\delta_r}{k})^{2\beta_r}/4|S_r|}{[(\frac{\delta_r}{k})^{\beta_r}|S_r|/2] + i - 1} \\
&\leq k \cdot (\frac{\delta_r}{k})^{\beta_r}/2.
\end{aligned} \tag{18}$$

Therefore, Condition 1 holds.

Next, we assume that Condition 1 holds and focus on proving Condition 2. In Algorithm 1, since we re-sample  $Q_r$  times for each arm  $j_r \in S_{k'}^r$ ,

$$\Pr(\hat{\theta}_{j_r} \geq \theta_{j_r} - 3\epsilon/16) \geq 1 - (\frac{\delta_r}{k})^{4\beta_r}. \tag{19}$$

Let  $\hat{\theta}_{min}$  be the smallest value inserted into  $S'$  in iteration  $r$ . By the union bound and Eq. (19), with probability  $1 - k \cdot (\frac{\delta_r}{k})^{4\beta_r}$ ,

$$\hat{\theta}_{min} \geq \theta_{b_r} - 3\epsilon/16 \geq u - 9\epsilon/16. \tag{20}$$

If  $\hat{\theta}_{min} \geq u - 9\epsilon/16$  holds, then  $S'(k) + 3\epsilon/4 \geq \hat{\theta}_{min} + 3\epsilon/4 \geq u + 3\epsilon/16$ . Therefore, Condition 2 holds.

Similar to Eq. (13) and (14), we can prove that with probability  $1 - 4(\frac{\delta_r}{k})^{2\beta_r}$ , there are less than  $(\frac{\delta_r}{k})^{2\beta_r}/4|S_r|$  arms in  $A_1$  and  $A_2$  whose empirical values are larger than  $u + 3\epsilon/16$ . This means that under Conditions 1 and 2, with probability  $1 - 4(\frac{\delta_r}{k})^{2\beta_r}$ ,  $|S_{r+1}| \leq (\frac{\delta_r}{k})^{2\beta_r}/4|S_r| + [(\frac{\delta_r}{k})^{\beta_r}|S_r|] + k - 1 - k$ . Note that the  $-k$  term is due to the factor that  $S_{k'}^r$  is selected from  $\text{top}-[(\frac{\delta_r}{k})^{\beta_r}|S_r|/2] + k' - 1$  arms but is eliminated in Line 10 of Algorithm 1.

Applying the union bound, we have

$$\Pr[|S_{r+1}| \leq (\frac{\delta_r}{k})^{2\beta_r}/4|S_r| + [(\frac{\delta_r}{k})^{\beta_r}|S_r|] - 1] \geq 1 - 5(\frac{\delta_r}{k})^{2\beta_r} - (\frac{\delta_r}{k})^{3\beta_r} - k(\frac{\delta_r}{k})^{\beta_r}/2 - k(\frac{\delta_r}{k})^{4\beta_r} - 4(\frac{\delta_r}{k})^{2\beta_r} \tag{21}$$

Note that  $\beta_r \geq 1$ ,  $\delta_r \leq \delta/4 \leq 1/16$ , we have

$$\Pr[|S_{r+1}| \leq [2(\frac{\delta_r}{k})^{\beta_r}|S_r|] - 1] \geq 1 - \frac{2\delta_r}{k} \geq 1 - 2\delta_r. \tag{22}$$

□

### Proof of Lemma 3

*Proof.* Proof of Part 1: Assume that Algorithm 1 terminates at iteration  $r'$ . Note that in Algorithm 1, each iteration has two rounds, and hence,  $R' = 2r'$ . We prove  $r' \leq \log_{\frac{k}{\delta}}^*(n)$ .

For  $r \leq r'$ , by Lemma 2, with probability  $1 - 2\delta_r$ ,  $|S_{r+1}| \leq [2 \cdot (\delta_r/k)^{\beta_r}|S_r|] - 1 \leq 2 \cdot (\delta_r/k)^{\beta_r}|S_r|$ . This implies that with probability  $1 - 2\delta_r$ ,

$$\beta_{r+1} \geq \frac{|S_r|}{2|S_{r+1}|} \cdot \beta_r \geq \frac{|S_r|}{4 \cdot (\delta_r/k)^{\beta_r}|S_r|} \cdot \beta_r = \frac{\beta_r}{4 \cdot (\delta_r/k)^{\beta_r}} \geq \frac{1}{(\delta/k)^{\beta_r}}. \tag{23}$$

Thus, with probability  $1 - 2(\delta_1 + \dots + \delta_r)$ ,

$$\beta_{r+1} \geq (\frac{k}{\delta})^{\beta_r} \geq (\frac{k}{\delta})^{(\frac{k}{\delta})^{\beta_{r-1}}} \geq \dots \geq \underbrace{\frac{k}{\delta}^{\frac{k}{\delta} \cdots \frac{k}{\delta}}}_r \tag{24}$$

For integer  $m \geq \log_{\frac{k}{\delta}}^*(n)$ , we have  $n \leq \underbrace{\frac{k}{\delta} \cdots \frac{k}{\delta}}_m$ . If  $m \leq r'$ , by Eq. (24), we have that with probability  $1 - 2(\delta_1 + \cdots + \delta_{m-1})$

$$\beta_m \geq \underbrace{\frac{k}{\delta} \cdots \frac{k}{\delta}}_{m-1}. \quad (25)$$

Assume that Eq. (25) holds. Then, by Lemma 2, with probability  $1 - 2\delta_m$ ,  $|S_{m+1}| \leq 2 \cdot (\delta_m/k)^{\beta_m} |S_m| \leq |S_m| / (2 \cdot \underbrace{\frac{k}{\delta} \cdots \frac{k}{\delta}}_m) \leq |S_m| / (2n) < 1$ . This implies  $S_{r+1} = \emptyset$ . Applying the union bound, we have that *w.p.*

$$1 - \sum_{i=1} 2\delta_i \geq 1 - \delta, \quad (26)$$

$$R' = 2r' \leq 2 \log_{\frac{k}{\delta}}^*(n).$$

Proof of Part 2: Let  $\rho = \log_{\frac{k}{\delta}}^*(n)$ . Given positive integer  $l$ , we prove *w.p.*  $1 - \frac{\delta}{2^{l-1}}$ ,  $r' \leq l\rho$ . Similar to Eq. (23) and (24), we have that with probability  $1 - 2(\delta_{(l-1)\rho+1} + \delta_{(l-1)\rho+2} + \cdots + \delta_{l\rho-1})$ ,

$$\beta_{l\rho} \geq \frac{1}{(\delta/k)^{\beta_{l\rho-1}}} \geq \cdots \geq \frac{1}{(\delta/k)^{\beta_{(l-1)\rho+1}}} \geq \underbrace{\frac{k}{\delta} \cdots \frac{k}{\delta}}_{\rho-1} \quad (27)$$

If above equation holds, then with probability  $1 - \delta_{l\rho}$ ,  $S_{l\rho+1} \leq 2 \cdot (\delta_{l\rho}/k)^{\beta_{l\rho}} |S_{l\rho}| \leq |S_{l\rho}| / (2 \cdot \underbrace{\frac{k}{\delta} \cdots \frac{k}{\delta}}_{\rho}) \leq |S_{l\rho}| / (2n) < 1$ , which means that  $S_{l\rho} = \emptyset$ . By the union bound, with probability  $1 - 2(\delta_{(l-1)\rho+1} + \delta_{(l-1)\rho+2} + \cdots + \delta_{l\rho}) \geq 1 - \frac{\delta}{2^{(l-1)\rho}}$ ,  $r' \leq l\rho$ .

Now, we have

$$\begin{aligned} \mathbb{E}[R'] &\leq 2(1 - \delta) \cdot \rho + 2(\delta - \frac{\delta}{2^\rho}) \cdot (2\rho) + 2(\frac{\delta}{2^\rho} - \frac{\delta}{2^{2\rho}}) \cdot (3\rho) + \cdots \\ &\leq 2\rho + \sum_{i=1} \left[ \frac{2\delta\rho}{2^{(i-1)\rho}} \right] \\ &\leq 2(1 + 2\delta)\rho = 2(1 + 2\delta) \log_{\frac{k}{\delta}}^*(n) \end{aligned} \quad (28)$$

□

#### Proof of Lemma 4

*Proof.* Proof of Part 1: Let  $\xi$  be the event that  $\beta_{r+1} = \beta_r \cdot \frac{|S_r|}{2|S_{r+1}|}$  holds for all  $r \geq 1$ . By Lemma 2, with probability  $1 - 2\delta_r$ ,  $|S_{r+1}| \leq \lceil 2 \cdot (\delta_r/k)^{\beta_r} |S_r| \rceil - 1 \leq 2 \cdot (\delta_r/k)^{\beta_r} |S_r| \leq \frac{2\delta}{k} |S_r|$ . Hence *w.p.*  $1 - 2\delta_r$ ,  $\beta_{r+1} = \beta_r \cdot \frac{|S_r|}{2|S_{r+1}|}$ . Applying the union bound, the event  $\xi$  holds with probability  $1 - \delta$ .

Assume that  $\xi$  holds. In iteration  $r$ , the total number of arms pulled by Lines 5 and 7 of Algorithm 1 is  $(|S_r| + 1) \cdot \beta_r \cdot Q \cdot \log \frac{k}{\delta_r}$ . Note that  $\delta \in (0, 1/4)$  and  $\beta_{r+1} = \beta_r \cdot \frac{|S_r|}{2|S_{r+1}|}$ , we have

$$\begin{aligned} N &= \sum_{i=1} [(|S_i| + 1) \cdot \beta_i \cdot Q \cdot \log \frac{k}{\delta_i}] \leq 2 \sum_{i=1} [|S_i| \cdot \beta_i \cdot Q \cdot \log \frac{k}{\delta_i}] \\ &\leq 2 \sum_{i=1} \left[ \frac{n}{2^{i-1}} \cdot Q \cdot \left( \log \frac{4k}{\delta} + i \right) \right] \\ &\leq 6n \cdot Q + 4nQ \cdot \log \frac{4k}{\delta} \end{aligned} \quad (29)$$

Thus with probability  $1 - \delta$ ,  $N \leq 7n \cdot Q \cdot \log \frac{4k}{\delta}$ .

**Proof of Part 2:** Let  $N_i$  be the number of samples in iteration  $r$ . By Lemma 2, with probability  $1 - 2\delta_r$ ,  $|S_{r+1}| \leq \lceil 2 \cdot (\delta_r/k)^{\beta_r} |S_r| \rceil - 1 \leq 2 \cdot (\delta_r/k)^{\beta_r} |S_r| \leq \frac{2\delta}{k} |S_r|$ . Then, by Algorithm 1, with probability  $1 - 2\delta_r$ ,  $\beta_{r+1} \cdot |S_{r+1}| = \beta_r \cdot |S_r|/2$ . If  $|S_{r+1}| \geq 16$ , given that  $\delta_r \leq \frac{1}{16}$ , we have

$$\begin{aligned} \mathbf{E}[N_{r+1}] &= (|S_{r+1}| + 1) \cdot \beta_{r+1} \cdot Q \cdot \log \frac{k}{\delta_{r+1}} \leq \frac{17}{16} |S_{r+1}| \cdot Q \cdot \beta_{r+1} \cdot \log \frac{k}{\delta_{r+1}} \\ &\leq \frac{17}{32} (1 - 2\delta_r) \cdot |S_r| \cdot Q \cdot \beta_r \cdot \log \frac{k}{\delta_{r+1}} + \frac{17}{16} \cdot 2\delta_r \cdot |S_r| \cdot Q \cdot \beta_r \cdot \log \frac{k}{\delta_{r+1}} \\ &\leq (1 - 2\delta_r) \cdot \frac{17N_r}{32} \cdot \frac{\log(k/\delta_{r+1})}{\log(k/\delta_r)} + \frac{17}{8} \delta_r \cdot N_r \cdot \frac{\log(k/\delta_{r+1})}{\log(k/\delta_r)} \\ &\leq \frac{3}{4} N_r. \end{aligned} \quad (30)$$

Then

$$\mathbf{E}[N_1 + \dots + N_{r+1}] \leq \mathbf{E}[N_1] + 3/4 \mathbf{E}[N_1] + \dots + (3/4)^r \mathbf{E}[N_1] \leq 4\mathbf{E}[N_1]. \quad (31)$$

If  $|S_{r+1}| \leq 16$ , then

$$N_{r+1} = (|S_{r+1}| + 1) \cdot \beta_{r+1} \cdot Q \cdot \log \frac{k}{\delta_{r+1}} \leq 2|S_{r+1}| \cdot \beta_{r+1} \cdot Q \cdot \log \frac{k}{\delta_{r+1}} \leq \frac{5}{2} N_r. \quad (32)$$

By Lemma 2, with probability  $1 - 2\delta_{r+1}$ ,  $|S_{r+2}| \leq \frac{2\delta_{r+1}}{k} |S_{r+1}| - 1 < 1$ . Thus

$$\mathbf{E}[N_{r+2}] \leq 2\delta_{r+1} \cdot \frac{5}{2} N_{r+1} \leq \frac{5}{32} N_{r+1}. \quad (33)$$

Hence,

$$\mathbf{E}[N_{r+1} + N_{r+2} + \dots] \leq \mathbf{E}[N_{r+1}] + \frac{5}{32} \mathbf{E}[N_{r+1}] + \dots \leq \frac{32}{27} \mathbf{E}[N_{r+1}] \leq \frac{80}{27} N_r \leq \frac{80}{27} N_1. \quad (34)$$

Therefore,  $\mathbf{E}[N] = \sum_{i=1} \mathbf{E}[N_i] \leq 4N_1 + \frac{80}{27} N_1 \leq 7(n+1) \cdot Q \cdot \log \frac{k}{\delta_1}$ .  $\square$

## Proof of Lemma 5

*Proof.* We first focus on iteration  $r \leq R - 1$ . For convenience, we follow the notation used in the proof of Lemma 2. By Eq.(21) in the proof of Lemma 2, we have that with probability at least  $1 - 5(\frac{\delta_r}{k})^{2\beta_r} - (\frac{\delta_r}{k})^{3\beta_r} - k(\frac{\delta_r}{k})^{\beta_r}/2 - k(\frac{\delta_r}{k})^{4\beta_r} - 4(\frac{\delta_r}{k})^{2\beta_r} \geq 1 - \frac{3}{2}\delta_r$ , both of the following conditions hold.

1:  $b_r \notin A_1$ ;

2: All the arms' empirical values in  $S_r \setminus S_{r+1}$  are smaller than  $u + 3/16\epsilon$ .

By Hoeffding's inequality, for arm  $j$  in iteration  $r$ , we have

$$\Pr(\hat{\theta}_j \geq \theta_j - 3\epsilon/16) \geq 1 - \left(\frac{\delta_r}{k}\right)^{4\beta_r}. \quad (35)$$

For  $r = 1$ , then applying the union bound, for arm set  $\{1^*, 2^*, \dots, i^*\}$ , with probability  $1 - k \cdot (\frac{\delta_1}{k})^{4\beta_1}$ , all arm's empirical value greater than  $\theta_{i^*} - 3\epsilon/16$ . Applying the union bound for all iterations, we have that w.p. at least  $1 - \frac{\delta^3}{32}$ , there are at least  $i$  arms in set  $\{1^*, 2^*, \dots, i^*\}$  whose empirical values are greater than  $\theta_{i^*} - 3\epsilon/16$ . Let  $\xi$  be the above event. Then  $\Pr[\xi] \geq 1 - \frac{\delta^3}{32}$ .

Without loss of generality, we assume that  $i^*$  is the first eliminated arm in  $\{1^*, 2^*, \dots, i^*\}$ , and that it is eliminated in iteration  $r$ . Let  $j_r$  be an arm inserted into  $S'$  in iteration  $r$ . Assume  $\xi$  holds. Combining two conditions together, we have that with probability  $1 - \frac{3}{2}\delta_r$ ,

$$\theta_{j_r} \geq \theta_{b_r} \geq u - 3/8\epsilon = u + 3/16\epsilon - 9/16\epsilon \geq \hat{\theta}_{i^*} - 9/16\epsilon \geq \theta_{i^*} - 3/4\epsilon. \quad (36)$$

In addition, Without loss of generality, we assume that  $i^*$  has been eliminated before iteration  $R$  and all  $x^*$  ( $x < i$ ) are kept in  $S_R$  ( $S_R \neq \emptyset$ ). In iteration  $R$  of Algorithm 3,

$$\beta_R \geq \left(\frac{k}{\delta}\right)^{\beta_{R-1}} \geq \left(\frac{k}{\delta}\right)^{\left(\frac{k}{\delta}\right)^{\beta_{R-2}}} \geq \dots \geq \underbrace{\frac{k}{\delta}}_{R-1}^{\beta_1} \quad (37)$$

By the definition of  $\beta_1$ , we have  $\lceil (\delta_R/k)^{\beta_R} |S_R|/2 \rceil < 1$ . It follows that  $(\frac{k}{\delta_R})^{\beta_R} \geq |S_R|/2$ . Thus, we have pulled each arm in  $S_R$  at least

$$Q \cdot \log\left(\frac{k}{\delta_R}\right)^{\beta_R} \geq \max\left\{Q \cdot \log \frac{S_R}{2}, Q \cdot \log \frac{k}{\delta_R}\right\} \geq \frac{Q \cdot \log \frac{S_R}{2} + Q \cdot \log \frac{k}{\delta_R}}{2} \geq \frac{Q}{2} \log \frac{k \cdot S_R}{2\delta_R} \quad (38)$$

times. Applying Hoeffding's inequality and the union bound, for every  $j_R \in S_R$ , we have that with probability  $1 - 2\delta_R$ ,

$$\theta_{j_R} - 1/7\epsilon \leq \hat{\theta}_{j_R} \leq \theta_{j_R} + 1/7\epsilon. \quad (39)$$

In Algorithm 3, we pull each arm (in  $S'$ )  $Q \log \frac{4|S'|}{\delta}$  times. By Hoeffding's inequality and the union bound, we have that with probability  $1 - \frac{\delta}{4}$ , for all  $s \in S'$ ,

$$\theta_s - 1/10\epsilon \leq \hat{\theta}_s \leq \theta_s + 1/10\epsilon. \quad (40)$$

By Eq. (36) and union bound, with probability  $1 - \frac{3}{2} \sum_{r=1} \delta_r - \Pr[\xi] \geq 1 - \delta/2$ , there are at least  $k$  arms in  $S'$  whose means are greater than  $\theta_{i^*} - 3/4\epsilon$ . Combining Eq. (40) and the union bound, we have that for any arm  $s$  whose empirical value is top- $i$  in Line 4 of Algorithm 3, with probability  $1 - \frac{3\delta}{4}$ ,

$$\theta_s \geq \hat{\theta}_s - 1/10\epsilon \geq \hat{\theta}_{i^*} - 3/4\epsilon - 1/10\epsilon > \theta_{i^*} - \epsilon. \quad (41)$$

Assume that Eq. (41), (40) and (39) hold. Again, we assume  $i^*$  has been eliminated before iteration  $R$  and all  $x^*$  ( $x < i$ ) are kept in  $S_R$  ( $S_R \neq \emptyset$ ). Let  $x^o$  be the top- $x$  returned arm. If  $x^o \in S'$ , we consider two cases as follows:

Case 1:  $x \geq i$ . By Eq. (41),  $\theta_{x^o} \geq \theta_{i^*} - \epsilon$ .

Case 2:  $x < i$ . By Eq. (40) and (39), we have

$$\theta_{x^o} + 1/10\epsilon \geq \hat{\theta}_{x^o} \geq \hat{\theta}_{x^*} \geq \theta_{x^*} - 1/7\epsilon. \quad (42)$$

Thus  $\theta_{x^o} \geq \theta_{x^*} - \epsilon$ .

On the other hand, if the returned arm  $x^o \notin S'$ , then we have  $x^o \in S_R$ . We differentiate two cases as follows.

Case 1:  $x < i$ . Note that  $x^* \in S_R$ . By Eq. (39), we have

$$\theta_{x^o} \geq \hat{\theta}_{x^o} - 1/7\epsilon \geq \hat{\theta}_{x^*} - 1/7\epsilon \geq \theta_{x^*} - 2/7\epsilon. \quad (43)$$

Case 2:  $x \geq i$ . We have

$$\theta_{x^o} \geq \hat{\theta}_{x^o} - 1/7\epsilon \geq \theta_{i^*} - 3/4\epsilon - 1/7\epsilon - 1/10\epsilon \geq \theta_{i^*} - \epsilon. \quad (44)$$

Applying the union bound, Eq. (41), (40), and (39) hold with probability at least  $1 - \delta$ , and hence, the lemma is proved.  $\square$

## Proof of Lemma 6

*Proof.* Let  $N_i$  be the number of arms pulled in iteration  $r \leq R - 1$ . For  $r \leq R - 2$ , we have

$$N_{r+1} = |S_{r+1}| \cdot \beta_{r+1} \cdot Q \cdot \log \frac{k}{\delta_{r+1}} \leq \frac{1}{2} |S_r| \cdot \beta_r \cdot Q \cdot \log \frac{k}{\delta_{r+1}} \leq \frac{3}{4} N_r. \quad (45)$$

Meanwhile, the  $R^{th}$  round consumes in two places: Line 2 and Line 4 in Algorithm 3. Let  $X$  be the sample cost of Line 2. Similar to Equation 45, we have  $X \leq 3/4 N_{R-1}$ . For Line 4, since  $|S'| \leq \log_{\frac{k}{\delta}}^*(n) \cdot k$ , it can be proved that the cost of Line 4 is bounded by  $O(\frac{n}{\epsilon^2} (\log \frac{k}{\delta} + \text{ilog}_{\frac{k}{\delta}}^{(R)}(n)))$ .

Therefore,  $N \leq O(\sum_{r=1}^{R-1} N_r) + O(\frac{n}{\epsilon^2} (\log \frac{k}{\delta} + \text{ilog}_{\frac{k}{\delta}}^{(R)}(n))) = O(\frac{n}{\epsilon^2} (\text{ilog}_{\frac{k}{\delta}}^{(R)}(n) + \log \frac{k}{\delta}))$ .  $\square$

### Elimination Arms

Work [13] can eliminate most arms below a given threshold by using the Elimination procedure defined in [24] as a subroutine. To bound the round complexity of the elimination procedure in our Theorem 3, we need the Elimination procedure in [24], Page 7,  $\delta_r \leftarrow \frac{\delta}{10 \cdot \underbrace{\frac{1}{\delta} \cdot \frac{1}{\delta}}_r}$ . Then, Lemma 2.4

in [24] still holds and each elimination costs  $O(\log_{\frac{1}{\delta}}^*(n))$  rounds.

### Proof of Lemma 8

*Proof.* We consider the Exponential-Gap-Eliminating process and divide it into two part. The first part is  $\epsilon_r \in [1, \Delta_k]$ . In this part, since  $\epsilon_{r+1} = \epsilon_r/8$ , we need at most  $\log \Delta_k^{-1}$  iterations. For each iteration, we need to run algorithm 1 and use  $\Omega(\log_{\frac{1}{\delta}}^*(n))$  rounds. Thus, for the first part, we need  $O(\log \Delta_k^{-1} \cdot \log_{\frac{1}{\delta}}^*(n))$  rounds.

The second part is  $\epsilon_r < \Delta_k$ . Once  $\epsilon_r < \Delta_k/8$ , from [13]'s Observation 4.2, we can get with high probability the algorithm will return. Thus, the round complexity of second part is  $O(\log_{\frac{1}{\delta}}^*(n))$ .  $\square$
